# Supplementary material for: Allelic Discrimination of Vitamin D Receptor Polymorphisms and Risk of Type 2 Diabetes Mellitus: A Case-Controlled Study
Source: MDPI journal article supplement (doi:10.3390/healthcare11040485), 2023-02-07
Supplement: s1 [file s1]

**Supplementary Table S1:** All Laboratory Findings of Studied Population

|                               | Group              |                        | p-value |
|-------------------------------|--------------------|------------------------|---------|
|                               | Control<br>(N=145) | diabetic gp<br>(N=156) |         |
| Age (years)<br>≤ median value | 73 (50.3%)         | 78 (50%)               | 0.952   |
| > median value                | 72 (49.7%)         | 78 (50%)               |         |
| Gender<br>male                | 82 (56.6%)         | 98 (62.8%)             | 0.268   |
| female                        | 63                 | 58                     |         |
| Smoking<br>no                 | 124 (85.5%)        | 138 (88.5%)            | 0.447   |
| yes                           | 21 (14.5%)         | 18 (11.5%)             |         |
| BMI ≤25                       | 45 (31%)           | 30(19.2%)              | 0.018   |
| >25                           | 100 (69%)          | 126 (80.8%)            |         |
| HB (g/dl)<br>normal           | 51 (35.2%)         | 60 (38.5%)             | 0.555   |
| abnormal                      | 94 (64.8%)         | 96 (61.5%)             |         |
| RBCs (Million/cm)<br>normal   | 54 (37.2%)         | 60 (38.5%)             | 0.827   |
| abnormal                      | 91 (62.8%)         | 96 (61.5%)             |         |
| WBCs %<br>normal              | 82 (56.6%)         | 47 (30.1%)             | <0.001  |
| abnormal                      | 63 (43.4%)         | 109 (69.9%)            |         |
| PLT (thousand/cm)<br>normal   | 145 (100%)         | 0 (0%)                 | <0.001  |
| abnormal                      | 0 (0%)             | 156 (100%)             |         |
| MCH (pg)<br>normal            | 104 (71.7%)        | 128 (82.1%)            | 0.033   |
| abnormal                      | 41 (28.3%)         | 28 (17.9%)             |         |
| MCHC (g/dl)<br>normal         | 42 (56.6%)         | 87 (30.1%)             | <0.001  |
| abnormal                      | 63 (43.4%)         | 109 (69.9%)            |         |
| PLT (thousand/cm)<br>normal   | 145 (100%)         | 0 (0%)                 | <0.001  |
| abnormal                      | 0 (0%)             | 156 (100%)             |         |
| MCH (pg)<br>normal            | 104 (71.7%)        | 128 (82.1%)            | 0.033   |
| abnormal                      | 41(28.3%)          | 28 (17.9%)             |         |
| MCHC (g/dl)<br>normal         | 42 (29%)           | 87 (55.8%)             | <0.001  |
| abnormal                      | 103 (71%)          | 69 (44.2%)             |         |

|                          |             |             |        |
|--------------------------|-------------|-------------|--------|
| Monocyte (g/L)<br>normal | 0 (0%)      | 4 (2.6%)    | *      |
| abnormal                 | 145 (100%)  | 152 (97.4%) |        |
| Hb A1C<br>normal         | 145 (100%)  | 36 (23.1%)  | <0.001 |
| prediabetic              | 0 (0%)      | 19 (12.2%)  |        |
| diabetic                 | 0 (0%)      | 101 (64.7%) |        |
| FBS<br>normal            | 89 (61.4%)  | 0 (0%)      | <0.001 |
| abnormal                 | 56 (38.6%)  | 156 (100%)  |        |
| PP<br>normal             | 130 (89.7%) | 3 (1.9%)    | <0.001 |
| abnormal                 | 15 (10.3%)  | 153 (98.1%) |        |
| GPT<br>normal            | 138 (95.2%) | 128 (82.1%) | <0.001 |
| abnormal                 | 7 (4.8%)    | 28 (17.9%)  |        |
| GOT<br>normal            | 145 (100%)  | 114 (73.1%) | <0.001 |
| abnormal                 | 0 (0%)      | 42 (26.9%)  |        |
| LDH (U/L)<br>normal      | 112 (77.2%) | 120 (76.9%) | 0.948  |
| abnormal                 | 33 (22.8%)  | 36 (23.1%)  |        |
| ESR (1hr)<br>normal      | 32 (22.1%)  | 31 (19.9%)  | 0.640  |
| abnormal                 | 113 (77.9%) | 125 (80.1%) |        |
| INR<br>normal            | 32 (22.1%)  | 31 (19.9%)  | 0.640  |
| abnormal                 | 113 (77.9%) | 125 (80.1%) |        |
| Urea<br>normal           | 143 (98.6%) | 145 (92.9%) | 0.016  |
| abnormal                 | 2 (1.4%)    | 11 (7.1%)   |        |
| Cholesterol<br>normal    | 143 (98.6%) | 133 (85.3%) | <0.001 |
| abnormal                 | 2 (1.4%)    | 23 (14.7%)  |        |
| TG<br>normal             | 125 (86.2%) | 39 (25%)    | <0.001 |
| abnormal                 | 20 (13.8%)  | 117 (75%)   |        |
| HDL<br>normal            | 25 (17.2%)  | 11 (7.1%)   | 0.006  |
| abnormal                 | 120 (82.8%) | 145 (92.9%) |        |
| LDH (U/L)<br>normal      | 33 (22.8%)  | 25 (16%)    | 0.139  |
| abnormal                 | 112 (77.2%) | 131 (84%)   |        |
| rs228570<br>mutant type  | 2 (1.4%)    | 45 (28.8%)  | <0.001 |
| wild type                | 143 (98.6%) | 111 (71.2%) |        |

|                        |             |             |        |
|------------------------|-------------|-------------|--------|
| rs1644410<br>wild type | 145 (100%)  | 143 (91.7%) | <0.001 |
| mutant type            | 0 (0%)      | 13 (8.3%)   |        |
| rs7975232<br>wild type | 143 (98.6%) | 147 (94.2%) | 0.063  |
| mutant type            | 2 (1.4%)    | 9 (5.8%)    |        |

**Supplementary Table S2:** Multivariate Analysis of Allelic Discrimination of rs228570

|             | Beta<br>coefficients | Standard<br>error | odds<br>ratio | 95% C.I. for odds<br>ratio |         | p-value |
|-------------|----------------------|-------------------|---------------|----------------------------|---------|---------|
|             |                      |                   |               | Lower                      | Upper   |         |
| BMI         | 0.673                | 0.304             | 1.961         | 1.080                      | 3.561   | .027    |
| Cholesterol | 2.191                | 0.776             | 8.948         | 1.957                      | 40.918  | .005    |
| rs228570    | 3.266                | 0.741             | 26.203        | 6.130                      | 112.007 | <0.001  |

**Supplementary Table S3:** Comparison between Study Groups based on rs228570

|                               | rs228570              |                      | p-value |
|-------------------------------|-----------------------|----------------------|---------|
|                               | mutant type<br>(n=47) | wild type<br>(n=254) |         |
| Age (years)<br>≤ median value | 26                    | 125                  | 0.442   |
|                               | 55.3%                 | 49.2%                |         |
| > median value                | 21                    | 129                  |         |
|                               | 44.7%                 | 50.8%                |         |
| Gender<br>male                | 31                    | 149                  | 0.349   |
|                               | 66.0%                 | 58.7%                |         |
| female                        | 16                    | 105                  |         |
|                               | 34.0%                 | 41.3%                |         |
| Smoking<br>no                 | 41                    | 221                  | 0.966   |
|                               | 87.2%                 | 87.0%                |         |
| yes                           | 6                     | 33                   |         |
|                               | 12.8%                 | 13.0%                |         |
| BMI ≤ 25                      | 10                    | 65                   | 0.530   |

|                             |       |       |        |
|-----------------------------|-------|-------|--------|
|                             | 21.3% | 25.6% |        |
| >25                         | 37    | 189   |        |
|                             | 78.7% | 74.4% |        |
| HB (g/dl)<br>normal         | 20    | 91    | 0.380  |
|                             | 42.6% | 35.8% |        |
| abnormal                    | 27    | 163   |        |
|                             | 57.4% | 64.2% |        |
| RBCs (Million/cm)<br>normal | 16    | 98    | 0.556  |
|                             | 34.0% | 38.6% |        |
| abnormal                    | 31    | 156   |        |
|                             | 66.0% | 61.4% |        |
| WBCs %<br>normal            | 10    | 119   | 0.001  |
|                             | 21.3% | 46.9% |        |
| abnormal                    | 37    | 135   |        |
|                             | 78.7% | 53.1% |        |
| PLT (thousand/cm)<br>normal | 2     | 143   | <0.001 |
|                             | 4.3%  | 56.3% |        |
| abnormal                    | 45    | 111   |        |
|                             | 95.7% | 43.7% |        |
| MCH (pg)<br>normal          | 37    | 195   | 0.770  |
|                             | 78.7% | 76.8% |        |
| abnormal                    | 10    | 59    |        |
|                             | 21.3% | 23.2% |        |
| MCHC (g/dl)<br>normal       | 26    | 103   | 0.060  |
|                             | 55.3% | 40.6% |        |
| abnormal                    | 21    | 151   |        |
|                             | 44.7% | 59.4% |        |
| Monocyte (g/L)<br>normal    | 2     | 2     | *      |
|                             | 4.3%  | .8%   |        |

|                      |       |       |        |
|----------------------|-------|-------|--------|
| abnormal             | 45    | 252   |        |
|                      | 95.7% | 99.2% |        |
| CRP (mg/L)<br>normal | 1     | 103   | 0.492  |
|                      | 50.0% | 72.0% |        |
| abnormal             | 1     | 40    |        |
|                      | 50.0% | 28.0% |        |
| Hb A1C<br>normal     | 10    | 171   | <0.001 |
|                      | 21.3% | 67.3% |        |
| prediabetic          | 6     | 13    |        |
|                      | 12.8% | 5.1%  |        |
| diabetic             | 31    | 70    |        |
|                      | 66.0% | 27.6% |        |
| FBS<br>normal        | 1     | 88    | <0.001 |
|                      | 2.1%  | 34.6% |        |
| abnormal             | 46    | 166   |        |
|                      | 97.9% | 65.4% |        |
| PP<br>normal         | 1     | 132   | <0.001 |
|                      | 2.1%  | 52.0% |        |
| abnormal             | 46    | 122   |        |
|                      | 97.9% | 48.0% |        |
| GPT<br>normal        | 42    | 224   | 0.818  |
|                      | 89.4% | 88.2% |        |
| abnormal             | 5     | 30    |        |
|                      | 10.6% | 11.8% |        |
| GOT<br>normal        | 39    | 220   | 0.509  |
|                      | 83.0% | 86.6% |        |
| abnormal             | 8     | 34    |        |
|                      | 17.0% | 13.4% |        |
| LDH (U/L)<br>normal  | 37    | 195   | 0.770  |
|                      | 78.7% | 76.8% |        |
| abnormal             | 10    | 59    |        |

|                        |       |       |        |
|------------------------|-------|-------|--------|
|                        | 21.3% | 23.2% |        |
| ESR (1hr)<br>normal    | 13    | 50    | 0.217  |
|                        | 27.7% | 19.7% |        |
| abnormal               | 34    | 204   |        |
|                        | 72.3% | 80.3% |        |
| INR<br>normal          | 13    | 50    | 0.217  |
|                        | 27.7% | 19.7% |        |
| abnormal               | 34    | 204   |        |
|                        | 72.3% | 80.3% |        |
| Urea<br>normal         | 43    | 245   | 0.124  |
|                        | 91.5% | 96.5% |        |
| abnormal               | 4     | 9     |        |
|                        | 8.5%  | 3.5%  |        |
| Cholesterol<br>normal  | 36    | 240   | <0.001 |
|                        | 76.6% | 94.5% |        |
| abnormal               | 11    | 14    |        |
|                        | 23.4% | 5.5%  |        |
| TG<br>normal           | 5     | 159   | <0.001 |
|                        | 10.6% | 62.6% |        |
| abnormal               | 42    | 95    |        |
|                        | 89.4% | 37.4% |        |
| HDL<br>normal          | 7     | 29    | 0.500  |
|                        | 14.9% | 11.4% |        |
| abnormal               | 40    | 225   |        |
|                        | 85.1% | 88.6% |        |
| LDH (U/L)<br>normal    | 9     | 49    | 0.982  |
|                        | 19.1% | 19.3% |        |
| abnormal               | 38    | 205   |        |
|                        | 80.9% | 80.7% |        |
| rs1644410<br>wild type | 42    | 246   | 0.020  |
|                        | 89.4% | 96.9% |        |

|                        |       |       |        |
|------------------------|-------|-------|--------|
| mutant type            | 5     | 8     |        |
|                        | 10.6% | 3.1%  |        |
| rs7975232<br>wild type | 44    | 246   | 0.278  |
|                        | 93.6% | 96.9% |        |
| mutant type            | 3     | 8     |        |
|                        | 6.4%  | 3.1%  |        |
| Control Group          | 2     | 143   | <0.001 |
|                        | 4.3%  | 56.3% |        |
| Diabetic group         | 45    | 111   |        |
|                        | 95.7% | 43.7% |        |

### Multivariate (logistic regression model)

|             | Beta<br>coefficients | Standard<br>error | odds<br>ratio | 95% C.I. for odds<br>ratio |        | p-value |
|-------------|----------------------|-------------------|---------------|----------------------------|--------|---------|
|             |                      |                   |               | Lower                      | Upper  |         |
| Cholesterol | 1.656                | .441              | 5.238         | 2.208                      | 12.427 | <0.001  |

**Supplementary Table S4:** Comparison between Study Groups based on rs1644410

|                               | rs1644410 |             | p-value |
|-------------------------------|-----------|-------------|---------|
|                               | wild type | mutant type |         |
| Age (years)<br><=median value | 146       | 5           | 0.388   |
|                               | 50.7%     | 38.5%       |         |
| > median value                | 142       | 8           |         |
|                               | 49.3%     | 61.5%       |         |
| Gender<br>male                | 174       | 6           | 0.305   |
|                               | 60.4%     | 46.2%       |         |
| female                        | 114       | 7           |         |
|                               | 39.6%     | 53.8%       |         |
| Smoking<br>No                 | 251       | 11          | 0.790   |
|                               | 87.2%     | 84.6%       |         |
| Yes                           | 37        | 2           |         |
|                               | 12.8%     | 15.4%       |         |

|                             |       |        |        |
|-----------------------------|-------|--------|--------|
| BMI <=25                    | 70    | 5      | 0.248  |
|                             | 24.3% | 38.5%  |        |
| >25                         | 218   | 8      |        |
|                             | 75.7% | 61.5%  |        |
| HB (g/dl)<br>normal         | 104   | 7      | 0.195  |
|                             | 36.1% | 53.8%  |        |
| abnormal                    | 184   | 6      |        |
|                             | 63.9% | 46.2%  |        |
| RBCs (Million/cm)<br>normal | 107   | 7      | 0.225  |
|                             | 37.2% | 53.8%  |        |
| abnormal                    | 181   | 6      |        |
|                             | 62.8% | 46.2%  |        |
| WBCs %<br>normal            | 4     | 0      | *      |
|                             | 1.4%  | 0.0%   |        |
| abnormal                    | 284   | 13     |        |
|                             | 98.6% | 100.0% |        |
| WBCs %<br>normal            | 125   | 4      | 0.368  |
|                             | 43.4% | 30.8%  |        |
| abnormal                    | 163   | 9      |        |
|                             | 56.6% | 69.2%  |        |
| PLT (thousand/cm)<br>normal | 145   | 0      | <0.001 |
|                             | 50.3% | 0.0%   |        |
| abnormal                    | 143   | 13     |        |
|                             | 49.7% | 100.0% |        |
| MCH (pg)<br>normal          | 224   | 8      | 0.173  |
|                             | 77.8% | 61.5%  |        |
| abnormal                    | 64    | 5      |        |
|                             | 22.2% | 38.5%  |        |
| MCHC (g/dl)<br>normal       | 121   | 8      | 0.164  |
|                             | 42.0% | 61.5%  |        |
| abnormal                    | 167   | 5      |        |
|                             | 58.0% | 38.5%  |        |
| Monocyte (g/L)<br>normal    | 4     | 0      | *      |
|                             | 1.4%  | 0.0%   |        |
| abnormal                    | 284   | 13     |        |
|                             | 98.6% | 100.0% |        |



|                     |       |        |       |
|---------------------|-------|--------|-------|
| Hb A1C<br>normal    | 177   | 4      | 0.068 |
|                     | 61.5% | 30.8%  |       |
| prediabetic         | 17    | 2      |       |
|                     | 5.9%  | 15.4%  |       |
| diabetic            | 94    | 7      |       |
|                     | 32.6% | 53.8%  |       |
| FBS<br>normal       | 89    | 0      | 0.017 |
|                     | 30.9% | 0.0%   |       |
| abnormal            | 199   | 13     |       |
|                     | 69.1% | 100.0% |       |
| PP<br>normal        | 133   | 0      | 0.001 |
|                     | 46.2% | 0.0%   |       |
| abnormal            | 155   | 13     |       |
|                     | 53.8% | 100.0% |       |
| GPT<br>normal       | 253   | 13     | 0.181 |
|                     | 87.8% | 100.0% |       |
| abnormal            | 35    | 0      |       |
|                     | 12.2% | 0.0%   |       |
| GOT<br>normal       | 249   | 10     | 0.332 |
|                     | 86.5% | 76.9%  |       |
| abnormal            | 39    | 3      |       |
|                     | 13.5% | 23.1%  |       |
| LDH (U/L)<br>normal | 223   | 9      | 0.491 |
|                     | 77.4% | 69.2%  |       |
| abnormal            | 65    | 4      |       |
|                     | 22.6% | 30.8%  |       |
| ESR (1hr)<br>normal | 62    | 1      | 0.230 |
|                     | 21.5% | 7.7%   |       |
| abnormal            | 226   | 12     |       |
|                     | 78.5% | 92.3%  |       |
| INR<br>normal       | 62    | 1      | 0.230 |
|                     | 21.5% | 7.7%   |       |
| abnormal            | 226   | 12     |       |
|                     | 78.5% | 92.3%  |       |
| Urea<br>normal      | 275   | 13     | 0.434 |

|                         |       |        |        |
|-------------------------|-------|--------|--------|
|                         | 95.5% | 100.0% |        |
| abnormal                | 13    | 0      |        |
|                         | 4.5%  | 0.0%   |        |
| Cholesterol<br>normal   | 267   | 9      | 0.003  |
|                         | 92.7% | 69.2%  |        |
| abnormal                | 21    | 4      |        |
|                         | 7.3%  | 30.8%  | 0.020  |
| TG<br>normal            | 161   | 3      |        |
|                         | 55.9% | 23.1%  |        |
| abnormal                | 127   | 10     |        |
|                         | 44.1% | 76.9%  | 0.628  |
| HDL<br>normal           | 35    | 1      |        |
|                         | 12.2% | 7.7%   |        |
| abnormal                | 253   | 12     |        |
|                         | 87.8% | 92.3%  | 0.717  |
| LDH (U/L)<br>normal     | 56    | 2      |        |
|                         | 19.4% | 15.4%  |        |
| abnormal                | 232   | 11     |        |
|                         | 80.6% | 84.6%  | <0.001 |
| Control Group           | 145   | 0      |        |
|                         | 50.3% | 0.0%   |        |
| Diabetic group          | 143   | 13     |        |
|                         | 49.7% | 100.0% | 0.020  |
| rs228570<br>mutant type | 42    | 5      |        |
|                         | 14.6% | 38.5%  |        |
| wild type               | 246   | 8      |        |
|                         | 85.4% | 61.5%  | <0.001 |
| rs7975232<br>wild type  | 285   | 5      |        |
|                         | 99.0% | 38.5%  |        |
| mutant type             | 3     | 8      |        |
|                         | 1.0%  | 61.5%  |        |

|  | Beta<br>coefficients | Standard<br>error | odds<br>ratio | 95% C.I. for odds<br>ratio |       | p-value |
|--|----------------------|-------------------|---------------|----------------------------|-------|---------|
|  |                      |                   |               | Lower                      | Upper |         |

|             |       |      |       |       |        |      |
|-------------|-------|------|-------|-------|--------|------|
| Cholesterol | 1.732 | .642 | 5.651 | 1.605 | 19.897 | .007 |
|-------------|-------|------|-------|-------|--------|------|

**Supplementary Table S5:** Comparison between Study Groups based on rs7975232

|                              | rs7975232            |                       | p-value |
|------------------------------|----------------------|-----------------------|---------|
|                              | wild type<br>(n=290) | mutant type<br>(n=11) |         |
| Age (years)<br>≤median value | 146                  | 5                     | 0.750   |
|                              | 50.3%                | 45.5%                 |         |
| > median value               | 144                  | 6                     |         |
|                              | 49.7%                | 54.5%                 |         |
| Gender<br>male               | 173                  | 7                     | 0.792   |
|                              | 59.7%                | 63.6%                 |         |
| female                       | 117                  | 4                     |         |
|                              | 40.3%                | 36.4%                 |         |
| Smoking<br>no                | 253                  | 9                     | 0.599   |
|                              | 87.2%                | 81.8%                 |         |
| yes                          | 37                   | 2                     |         |
|                              | 12.8%                | 18.2%                 |         |
| BMI<br>≤25                   | 73                   | 2                     | 0.599   |
|                              | 25.2%                | 18.2%                 |         |
| >25                          | 217                  | 9                     |         |
|                              | 74.8%                | 81.8%                 |         |
| HB (g/dl)<br>normal          | 106                  | 5                     | 0.548   |
|                              | 36.6%                | 45.5%                 |         |
| abnormal                     | 184                  | 6                     |         |
|                              | 63.4%                | 54.5%                 |         |
| RBCs (Million/cm)<br>normal  | 107                  | 7                     | 0.073   |

|                             |       |        |       |
|-----------------------------|-------|--------|-------|
|                             | 36.9% | 63.6%  |       |
| abnormal                    | 183   | 4      |       |
|                             | 63.1% | 36.4%  |       |
| WBCs %<br>normal            | 126   | 3      | 0.287 |
|                             | 43.4% | 27.3%  |       |
| abnormal                    | 164   | 8      |       |
|                             | 56.6% | 72.7%  |       |
| PLT (thousand/cm)<br>normal | 143   | 2      | 0.043 |
|                             | 49.3% | 18.2%  |       |
| abnormal                    | 147   | 9      |       |
|                             | 50.7% | 81.8%  |       |
| MCH (pg)<br>normal          | 224   | 8      | 0.727 |
|                             | 77.2% | 72.7%  |       |
| abnormal                    | 66    | 3      |       |
|                             | 22.8% | 27.3%  |       |
| MCHC (g/dl)<br>normal       | 123   | 6      | 0.425 |
|                             | 42.4% | 54.5%  |       |
| abnormal                    | 167   | 5      |       |
|                             | 57.6% | 45.5%  |       |
| Monocyte (g/L)<br>normal    | 4     | 0      | *     |
|                             | 1.4%  | 0.0%   |       |
| abnormal                    | 286   | 11     |       |
|                             | 98.6% | 100.0% |       |
| CRP (mg/L)<br>normal        | 102   | 2      | 0.371 |
|                             | 71.3% | 100.0% |       |
| abnormal                    | 41    | 0      |       |
|                             | 28.7% | 0.0%   |       |
| Hb A1C<br>normal            | 177   | 4      | 0.087 |

|                     |       |       |       |
|---------------------|-------|-------|-------|
|                     | 61.0% | 36.4% |       |
| prediabetic         | 19    | 0     |       |
|                     | 6.6%  | 0.0%  |       |
| diabetic            | 94    | 7     |       |
|                     | 32.4% | 63.6% |       |
| FBS<br>normal       | 87    | 2     | 0.399 |
|                     | 30.0% | 18.2% |       |
| abnormal            | 203   | 9     |       |
|                     | 70.0% | 81.8% |       |
| PP<br>normal        | 131   | 2     | 0.077 |
|                     | 45.2% | 18.2% |       |
| abnormal            | 159   | 9     |       |
|                     | 54.8% | 81.8% |       |
| GPT<br>normal       | 256   | 10    | 0.789 |
|                     | 88.3% | 90.9% |       |
| abnormal            | 34    | 1     |       |
|                     | 11.7% | 9.1%  |       |
| GOT<br>normal       | 249   | 10    | 0.635 |
|                     | 85.9% | 90.9% |       |
| abnormal            | 41    | 1     |       |
|                     | 14.1% | 9.1%  |       |
| LDH (U/L)<br>normal | 227   | 5     | 0.011 |
|                     | 78.3% | 45.5% |       |
| abnormal            | 63    | 6     |       |
|                     | 21.7% | 54.5% |       |
| ESR (1hr)<br>normal | 61    | 2     | 0.819 |
|                     | 21.0% | 18.2% |       |
| abnormal            | 229   | 9     |       |
|                     | 79.0% | 81.8% |       |

|                        |       |        |        |
|------------------------|-------|--------|--------|
| INR<br>normal          | 61    | 2      | 0.819  |
|                        | 21.0% | 18.2%  |        |
| abnormal               | 229   | 9      |        |
|                        | 79.0% | 81.8%  |        |
| Urea<br>normal         | 277   | 11     | 0.473  |
|                        | 95.5% | 100.0% |        |
| abnormal               | 13    | 0      |        |
|                        | 4.5%  | 0.0%   |        |
| Cholesterol<br>normal  | 268   | 8      | 0.020  |
|                        | 92.4% | 72.7%  |        |
| abnormal               | 22    | 3      |        |
|                        | 7.6%  | 27.3%  |        |
| TG<br>normal           | 161   | 3      | 0.065  |
|                        | 55.5% | 27.3%  |        |
| abnormal               | 129   | 8      |        |
|                        | 44.5% | 72.7%  |        |
| HDL<br>normal          | 34    | 2      | 0.517  |
|                        | 11.7% | 18.2%  |        |
| abnormal               | 256   | 9      |        |
|                        | 88.3% | 81.8%  |        |
| LDH (U/L)<br>normal    | 56    | 2      | 0.926  |
|                        | 19.3% | 18.2%  |        |
| abnormal               | 234   | 9      |        |
|                        | 80.7% | 81.8%  |        |
| rs1644410<br>wild type | 285   | 3      | <0.001 |
|                        | 98.3% | 27.3%  |        |
| mutant type            | 5     | 8      |        |
|                        | 1.7%  | 72.7%  |        |
| Control Group          | 143   | 2      | 0.043  |

|                         |       |       |       |
|-------------------------|-------|-------|-------|
|                         | 49.3% | 18.2% |       |
| diabetic                | 147   | 9     |       |
|                         | 50.7% | 81.8% |       |
| rs228570<br>mutant type | 44    | 3     | 0.278 |
|                         | 15.2% | 27.3% |       |
| wild type               | 246   | 8     |       |
|                         | 84.8% | 72.7% |       |

|             | Beta<br>coefficients | Standard<br>error | odds<br>ratio | 95% C.I. for odds<br>ratio |        | p-value |
|-------------|----------------------|-------------------|---------------|----------------------------|--------|---------|
|             |                      |                   |               | Lower                      | Upper  |         |
| Cholesterol | 1.519                | .712              | 4.568         | 1.131                      | 18.456 | .033    |

## **Vitamin D**

**Supplementary Table S6:** Comparison between Study Groups based on Vitamin D Status

|                               | Vitamin D         |                  | p-value |
|-------------------------------|-------------------|------------------|---------|
|                               | <=34.5<br>(n=157) | >34.5<br>(n=144) |         |
| Gender<br>male                | 95 (60.5%)        | 85 (59%)         | 0.793   |
| female                        | 62 (39.5%)        | 59 (41%)         |         |
| Age (years)<br><=median value | 79 (50.3%)        | 72 (50%)         | 0.956   |
| > median value                | 78 (49.7%)        | 72 (50%)         |         |
| BMI <=25                      | 39 (24.8%)        | 36 (25%)         | 0.975   |
| >25                           | 118 (75.2%)       | 108 (75%)        |         |
| HB (g/dl)<br>normal           | 59 (37.6%)        | 52 (36.1%)       | 0.792   |
| abnormal                      | 98 (62.4%)        | 92 (63.9%)       |         |
| RBCs (Million/cm)<br>normal   | 58 (36.9%)        | 56 (38.9%)       | 0.728   |
| abnormal                      | 99 (63.1%)        | 88 (61.1%)       |         |
| WBCs %                        | 3 (1.9%)          | 1 (0.7%)         | *       |

|                      |             |             |        |
|----------------------|-------------|-------------|--------|
| normal               |             |             |        |
| abnormal             | 153 (98.1%) | 143 (99.3)  |        |
| PLT<br>(thousand/cm) | 101 (64.3%) | 44 (30.6%)  | <0.001 |
| normal               |             |             |        |
| abnormal             | 56 (35.7%)  | 100 (69.4%) |        |
| MCH (pg)             | 122 (77.7%) | 110 (76.4%) | 0.786  |
| normal               |             |             |        |
| abnormal             | 35 (22.3%)  | 34 (23.6%)  |        |
| MCHC (g/dl)          | 59 (37.6%)  | 70 (48.6%)  | 0.053  |
| normal               |             |             |        |
| abnormal             | 98 (62.4%)  | 74 (51.4%)  |        |
| CRP (mg/L)           | 77 (76.2%)  | 27 (61.4%)  | 0.067  |
| normal               |             |             |        |
| abnormal             | 24 (23.8%)  | 17 (38.6%)  |        |
| LDH (U/L)            | 121 (77.1%) | 111 (77.1%) | 0.998  |
| normal               |             |             |        |
| abnormal             | 36 (22.9%)  | 33 (2.9%)   |        |
| Smoking              | 137 (87.3%) | 125 (86.8)  | 0.906  |
| no                   |             |             |        |
| yes                  | 20 (12.7%)  | 19 (13.2%)  |        |
| rs228570             | 21 (13.4%)  | 26 (18.1%)  | 0.264  |
| mutant type          |             |             |        |
| wild type            | 136 (86.6%) | 118 (81.9%) |        |
| rs1644410            | 154 (98.1%) | 134 (93.1%) | 0.032  |
| wild type            |             |             |        |
| mutant type          | 3 (1.9%)    | 10 (6.9%)   |        |
| rs7975232            | 154 (98.1%) | 136 (94.4%) | 0.092  |
| wild type            |             |             |        |
| mutant type          | 3 (1.9%)    | 8 (5.6%)    |        |

Multivariate (logistic regression model)

|           | Beta<br>coefficients | Standard<br>error | odds<br>ratio | 95% C.I. for odds<br>ratio |        | p-value |
|-----------|----------------------|-------------------|---------------|----------------------------|--------|---------|
|           |                      |                   |               | Lower                      | Upper  |         |
| rs1644410 | 1.343                | 0.669             | 3.831         | 1.033                      | 14.209 | 0.045   |

### **Fasting insulin**

Supplementary Figure S1: ROC curve of Fasting Insulin



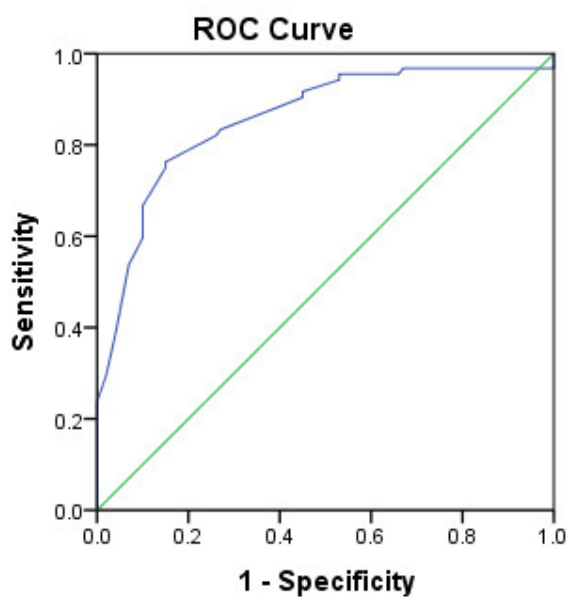

### Area Under the Curve

Test Result Variable(s): Fasting Insulin

| Area  | Standard error | P value | 95% Confidence Interval |             |
|-------|----------------|---------|-------------------------|-------------|
|       |                |         | Lower Bound             | Upper Bound |
| 0.858 | 0.024          | <0.001  | 0.811                   | 0.904       |

| Cut off value | Sensitivity | Specificity |
|---------------|-------------|-------------|
| 8.1           | 76.3        | 85          |

**Supplementary Table S7:**Insulin Status Among the Study Groups

|             | Frequency | Valid Percent |
|-------------|-----------|---------------|
| Valid <=8.1 | 122       | 47.7          |
| >8.1        | 134       | 52.3          |
| Total       | 256       | 100.0         |

**Supplementary Table S8:** Comparison between Study Groups based on Fasting Insulin

|                    | fasting insulin |             | p-value |
|--------------------|-----------------|-------------|---------|
|                    | <=8.1           | >8.1        |         |
| Gender             |                 |             |         |
| male               | 67 (54.9%)      | 84 (62.7%)  | 0.207   |
| female             | 55 (45.1%)      | 50 (37.3%)  |         |
| Age (years)        |                 |             |         |
| <=median value     | 63 (51.6%)      | 64 (47.8%)  | 0.535   |
| > median value     | 59 (48.4%)      | 70 (52.2%)  |         |
| BMI                |                 |             |         |
| <=25               | 33 (27.0%)      | 28 (20.9%)  | 0.248   |
| >25                | 89 (73.0%)      | 106 (79.1%) |         |
| HB (g/dl)          |                 |             |         |
| normal             | 42 (34.4%)      | 56 (41.8%)  | 0.226   |
| abnormal           | 80 (65.6%)      | 78 (58.2%)  |         |
| RBCs (Million/cm)  |                 |             |         |
| normal             | 43 (35.2%)      | 57 (42.5%)  | 0.232   |
| abnormal           | 79 (64.8%)      | 77 (57.5%)  |         |
| WBCs % (n=255)     |                 |             |         |
| normal             | 2 (1.6%)        | 0 (0%)      | *       |
| abnormal           | 120 (98.4 %)    | 133 (100%)  |         |
| PLT (thousand/cm)  |                 |             |         |
| (n=256) normal     | 85 (69.7%)      | 15 (11.2%)  | <0.001  |
| abnormal           | 37 (30.3%)      | 119 (88.8%) |         |
| MCH (pg) (n=256)   |                 |             |         |
| normal             | 94 (77%)        | 108 (80.6%) | 0.487   |
| abnormal           | 28 (23%)        | 26 (19.4%)  |         |
| MCHC (g/dl)        |                 |             |         |
| normal             | 45 (36.9%)      | 72 (53.7%)  | 0.007   |
| abnormal           | 77 (63.1%)      | 62 (46.3%)  |         |
| CRP (mg/L) (n=100) |                 |             |         |
| normal             | 58 (68.2%)      | 12 (80%)    | 0.359   |
| abnormal           | 27 (31.8%)      | 3 (20%)     |         |
| LDH (U/L)          |                 |             |         |
| normal             | 91 (74.6%)      | 103 (76.9%) | 0.671   |
| abnormal           | 31 (25.4%)      | 31 (23.1%)  |         |
| Smoking            |                 |             |         |
| no                 | 101 (82.8%)     | 116 (86.6%) | 0.401   |

|                         |                |                |        |
|-------------------------|----------------|----------------|--------|
| yes                     | 21 (17.2%)     | 18<br>(13.4%)  |        |
| Vitamin D<br>≤34.5      | 77 (63.1%)     | 50<br>(37.3%)  | <0.001 |
| >34.5                   | 45 (36.9%)     | 84<br>(62.7%)  |        |
| rs228570<br>mutant type | 11 (9%)        | 36<br>(26.9%)  | <0.001 |
| wild type               | 111 (91%)      | 98<br>(73.1%)  |        |
| rs1644410<br>wild type  | 118<br>(96.7%) | 125<br>(93.3%) | 0.211  |
| mutant type             | 4 (3.3%)       | 9 (6.7%)       |        |
| rs7975232<br>wild type  | 120 (98.4%)    | 125<br>(93.3%) | 0.045  |
| mutant type             | 2 (1.6%)       | 9 (6.7%)       |        |

#### Multivariate (logistic regression model)

|          | Beta<br>coefficients | Standard<br>error | odds<br>ratio | 95% C.I. for odds<br>ratio |       | p-value |
|----------|----------------------|-------------------|---------------|----------------------------|-------|---------|
|          |                      |                   |               | Lower                      | Upper |         |
| rs228570 | 1.329                | 0.382             | 3.779         | 1.786                      | 7.993 | 0.001   |
| vit D    | 1.069                | 0.267             | 2.913         | 1.727                      | 4.913 | <0.001  |
